# Supplementary material
Source: PubMed Central journal article supplement (PMC6460409)

## Online supplements

### Appendix 1. Details of the (A) DSS-discharge and (B) DSS-3 months.

The probability of each of the outcome categories is calculated according to the logistic formula:  $1/(1 + \exp^{-LP})$ , in which LP stands for linear predictor.

**A.** To calculate the probability P on each of the five BI categories:

Slope Barthel for age<60 = nihss\*-0.213 + 6\*-0.468 + diabetes\*-0.496

Slope Barthel for age>60 = nihss\*-0.213 + age per decade\*-0.468 + diabetes\*-0.496

LP(Barthel 19-20) = Slope + 4.91

LP(Barthel 15-18) = Slope + 5.45 - Slope + 4.91

LP(Barthel 10-14) = Slope + 6.14 - Slope + 5.45

LP(Barthel 1-9) = Slope + 7.66 - Slope + 6.14

LP(Barthel 0) = 1 - Slope + 7.66

**B.** To calculate the probability P on each of the five mRS categories:

Slope Rankin for age<60 = nihss\*0.182 + 6\*0.495 + diabetes\*0.410 + previous stroke\*0.249 + atrial fibrillation\*0.212

Slope Rankin for age>60 = nihss\*0.182 + age per decade\*0.495 + diabetes\*0.410 + previous stroke\*0.249 + atrial fibrillation\*0.212

LP(Rankin 6) = Slope + -4.68

LP(Rankin 4-5) = Slope + -3.76 - Slope + -4.68

LP(Rankin 3) = Slope + -2.93 - Slope + -3.76

LP(Rankin 2) = Slope + -1.89 - Slope + -2.93

LP(Rankin 0-1) = 1 - Slope + -1.89

**Supplemental Table 1.** Discriminative ability of DSS-3 months in internal and external validation.

| Internal validation    |                                        |                  |                  |                  |                          |                                               |
|------------------------|----------------------------------------|------------------|------------------|------------------|--------------------------|-----------------------------------------------|
| Cohort                 | mRS at three months                    |                  |                  | Apparent AUC     | Internally validated AUC |                                               |
| PAIS<br>(n = 1227)     |                                        |                  |                  | 0.75 (0.74-0.77) | 0.748 (0.74-0.77)        |                                               |
| External validation    |                                        |                  |                  |                  |                          |                                               |
| Cohort                 | AUCs for different mRS cutoffs (95%CI) |                  |                  |                  | Ordinal AUC<br>(95%CI)   | Ordinal case-<br>mix-corrected<br>AUC (95%CI) |
|                        | ≥ 2                                    | ≥ 3              | ≥ 4              | ≥ 6              |                          |                                               |
| PRACTISE<br>(n = 1589) | 0.77 (0.77-0.79)                       | 0.81 (0.81-0.84) | 0.83 (0.83-0.86) | 0.83 (0.83-0.86) | 0.74 (0.72-0.76)         | 0.79 (0.76-0.79)                              |
| PASS<br>(n = 2107)     | 0.66 (0.66-0.68)                       | 0.81 (0.81-0.83) | 0.84 (0.84-0.86) | 0.85 (0.85-0.88) | 0.69 (0.69-0.72)         | 0.77 (0.76-0.78)                              |
| Total<br>(n = 4923)    | 0.73 (0.73-0.74)                       | 0.81 (0.81-0.83) | 0.84 (0.84-0.86) | 0.83 (0.83-0.85) | 0.73 (0.72-0.74)         | 0.78 (0.77-0.79)                              |

*mRS=modified Rankin Scale; AUC=area under the curve*

**Supplemental Figure 1.** Outcome distribution of (A) the BI at discharge in PAIS and (B) the mRS at three months in PAIS, PRACTISE and PASS.

[insert Supplemental Figure 1A and B.]

A.

Outcome distribution of mRS at three months in PAIS, PRACTISE and PASS data

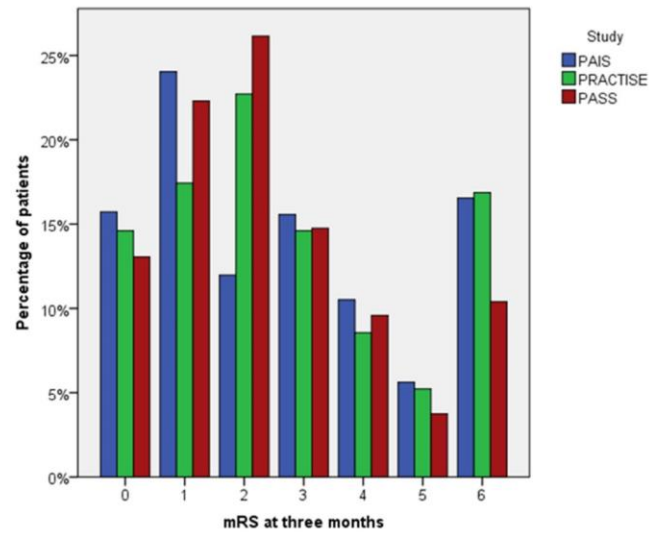

B.

Outcome distribution BI at discharge in PAIS data

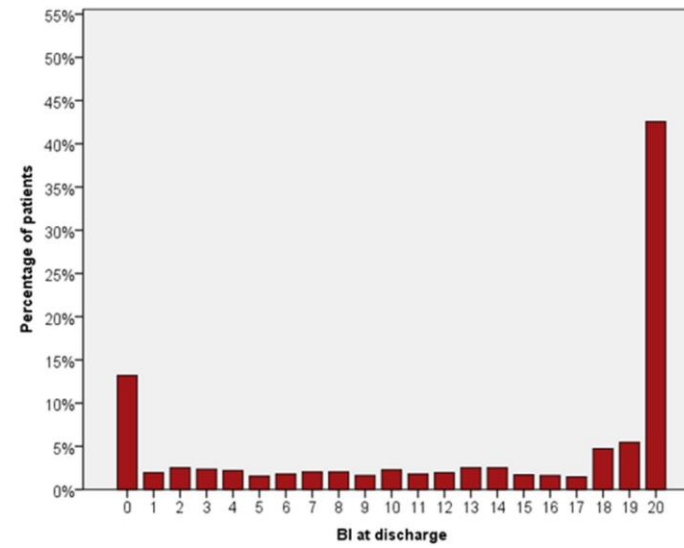

**Supplemental Figure 2.** Non-linear relation between age and the log odds of higher BI at discharge after acute ischemic stroke in PAIS.  
[insert Supplemental Figure 2.]

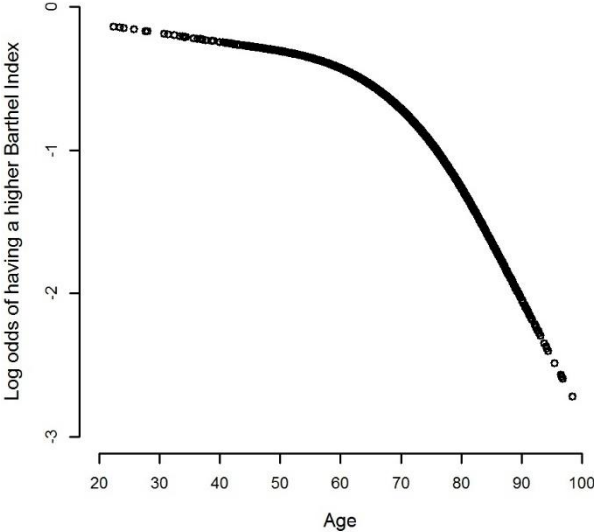

Supplement: 754591_supplementary_material.pdf [file 754591_supplementary_material.pdf]
